# Supplementary material for: Marine Environmental Change Induced by Anthropogenic Activities – From a Viewpoint of Aquatic Palynomorph Assemblages Preserved in Sediment Cores of Beppu Bay, West Japan
Source: Frontiers journal article supplement (doi:10.3389/fmars.2022.843824), 2022-03-28
Supplement: Data_Sheet_1.PDF [file Data_Sheet_1.PDF]

| Taxa                                      | Habitat                                             | Life mode                                                       | Mode of nutrition                                                                                                                                                                                       | Common remaining parts            | Morphological types and features                                                                                                                                   | Representative fossil name (example)                                                                                                                       | Reference                                                                               |
|-------------------------------------------|-----------------------------------------------------|-----------------------------------------------------------------|---------------------------------------------------------------------------------------------------------------------------------------------------------------------------------------------------------|-----------------------------------|--------------------------------------------------------------------------------------------------------------------------------------------------------------------|------------------------------------------------------------------------------------------------------------------------------------------------------------|-----------------------------------------------------------------------------------------|
| Cyanobacteria                             | freshwater, blackishwater, marine                   |                                                                 | photosynthetic                                                                                                                                                                                          | heterocyst akinete sheath         | elongatedly rectangular, ellipsoidal, fusiform, subspherical with tail                                                                                             |                                                                                                                                                            | van Geel 2001                                                                           |
| Dinophyta                                 | abundantly marine (commonly blackish, freshwater)   | mainly planktonic                                               | photosynthetic, heterotrophic (bacteria, diatoms, other phototrophic dinoflagellates, ciliates, nonphotoflagellates, colorless deterial particles) mixotrophic                                          | resting cyst                      | sperical to subspherical type ellipsoidal type peridinioid type ovoidal type with various surface ornamentations transverse and longitudinal furrows archeopyle    | <i>Spiniferites</i><br><i>Brigantidinium</i>                                                                                                               | Wall and Dale 1968<br>Jacobson and Anderson 1986<br>Hansen 1991                         |
| Acritarch                                 | mainly marine (commonly brackish water, freshwater) | probably planktonic autotrophic, heterotrophic, mixotrophic (?) | mainly photosynthetic, heterotrophic (?) mixotrophic (?)                                                                                                                                                | resting cell?                     | sperical to subspherical type ellipsoidal type peridinioid type ovoidal type ornamented with various appendages and openings                                       | <i>Baltisphaeridium</i><br><i>Michrystidium</i>                                                                                                            | Downie et al. 1963                                                                      |
| Chlorophyta                               | mainly freshwater, blackishwater, marine            | planktonic, benthic                                             | photosynthetic                                                                                                                                                                                          | resting cell                      |                                                                                                                                                                    | <i>Oedogoniaceae (Oedogonium)</i><br><i>Botryococcaceae (Botryococcus)</i><br><i>Hydrodictyaceae (Pediastrum)</i><br><i>Scenedesmacaceae (Scenedesmus)</i> | Sumilovskikh et al. 2021                                                                |
| Charophyta                                | mainly freshwater, blackishwater, marine            | planktonic, benthic                                             | photosynthetic                                                                                                                                                                                          | zygospore aplanospore             | spherical, ovoidal, elongatedly ovoidal, square, dome-shaped                                                                                                       | <i>Zygnemataceae (Spirogyra)</i><br><i>Desmidiaceae (Cosmarium)</i><br><i>Ovoidites</i>                                                                    | van Geel 2001                                                                           |
| Prasinophyta                              | mainly marine                                       | planktonic                                                      | photosynthetic                                                                                                                                                                                          | resting phycoma                   | sperical to subspherical type with or without fenestrate walls and membranous surface ornaments                                                                    | <i>Tasmanites</i> , <i>Cymatosphaera</i><br><i>Pleurozonaria</i> , <i>Pterosperma</i><br><i>Pterospermella</i>                                             | Wall 1962<br>Park et al. 1978                                                           |
| Eugranophyta                              | mainly freshwater                                   | planktonic                                                      | photosynthetic                                                                                                                                                                                          | loricate                          |                                                                                                                                                                    | <i>Trachelomonas</i>                                                                                                                                       | Sumilovskikh et al. 2019                                                                |
| Ciliophora                                | marine, freshwater, blackishwater                   | planktonic                                                      | heterotrophic (bacteria, diatoms, dinoflagellates, microflagellates (chlorophytes, chrysophytes, pelagophytes, prasiophytes, pyrenomonadaceae), raphidophytes, other ciliates, small organic particles) | lorica                            | circular cylindrical inverted frustum                                                                                                                              | <i>Strombidium</i><br><i>Hexasterias</i><br><i>Halodinium</i><br><i>Radiosperma</i>                                                                        | Dolan et al. 2013<br>Reid and John 1978<br>Gurdebeke et al. 2018<br>Taniguchi 1975      |
|                                           |                                                     |                                                                 |                                                                                                                                                                                                         | resting cyst                      | sperical type elliptical type spindle type disk-shaped type                                                                                                        |                                                                                                                                                            |                                                                                         |
| Amoebozoa                                 | freshwater to blackishwater                         | benthic                                                         | heterotrophic (organic detritus?)                                                                                                                                                                       | organic shell                     | discoidal, cup-shaped and elongated ellipsoidal with simple opening.                                                                                               |                                                                                                                                                            | Meisterfeld 2002                                                                        |
| Foraminifera (microforaminiferal linings) | marine, blackishwater                               | benthic                                                         | heterotrophic (bacteria, pennate diatoms, microalgae, other protozoans, and dead organic material)                                                                                                      | organic inner lining              | single chamber type uniserial type biserial type coiled type compound type                                                                                         |                                                                                                                                                            | Stancliffe 1989<br>Kitazato 1981<br>Topping et al. 2006<br>Armstrong and Braseir 2007   |
| Fungi                                     | freshwater, blackishwater, marine                   | synbiont                                                        | heterotrophic                                                                                                                                                                                           |                                   | spore, fruiting bodies, hyphae                                                                                                                                     | chlamydospore<br>conidophore                                                                                                                               | Travers 2007<br>van Geel 2001                                                           |
| Crustaceae                                | marine, freshwater, blackishwater                   | planktonic heterotrophic                                        | heterotrophic (diatoms, dinoflagellates, ciliates, fecal pellets, organic detritus)                                                                                                                     | exoskeleton                       | intercoxal plate<br>tail sternite<br>appendage, etc                                                                                                                |                                                                                                                                                            | van Wavern 1993                                                                         |
|                                           |                                                     |                                                                 |                                                                                                                                                                                                         | egg envelope                      | discoid type<br>folded discoid type<br>double saucer shapd type<br>fissured sphere type<br>hemisphere type<br>ellise type<br>fusiform type<br>double fusiform type | <i>Cobricosphaeridium</i>                                                                                                                                  | van Wavern 1993<br>McMinn et al. 1992<br>Sherr and Sherr 1988<br>Uye and Takamatsu 1990 |
| Ostracod                                  | marine, freshwater, blackishwater                   | benthic                                                         | heterotrophic                                                                                                                                                                                           | mandibles and carapace linings    |                                                                                                                                                                    |                                                                                                                                                            | Mudie et al. 2021                                                                       |
| Polychaeta                                | freshwater, blackishwater, marine                   | benthic                                                         | heterotrophic                                                                                                                                                                                           | mouth-lining parts<br>scolecodont |                                                                                                                                                                    |                                                                                                                                                            | Travers 2007<br>Mudie et al. 2021                                                       |
| Turbellaria                               | freswater Freshwater, blackishwater, marine         | benthic                                                         | heterotrophic                                                                                                                                                                                           | egg capsule                       | stalk Group<br>ellipsoidal type<br>cup-shaped type<br>spherical type<br>non-Stalk Group<br>ellipsoidal/cup-shaped type sp.<br>spherical type                       | <i>Palaeocystomopsis</i>                                                                                                                                   | Mudie et al. 2021<br>Matsuoka and Ando 2021                                             |
